# Supplementary material
Source: PubMed Central journal article supplement (PMC9156721)
Supplement: NIHMS1759813-supplement-Supp1.pdf [file NIHMS1759813-supplement-Supp1.pdf]

Supplemental Table A: Unadjusted Prevalence of Cigarette Use in the Past 30 Days, by Black/Non-Black Race and by Year (95% Confidence Intervals in Parentheses) for 12<sup>th</sup> Grade Students

|                                 | ----- Years of survey ----- |                                    |                                  |
|---------------------------------|-----------------------------|------------------------------------|----------------------------------|
|                                 | 2012-2014                   | 2015-17                            | 2018-20                          |
| <i>Any Cigarette</i>            |                             |                                    |                                  |
| All                             | 15.51<br>(14.23-16.88)      | 9.87 <sup>a</sup><br>(8.94-10.89)  | 5.93 <sup>a</sup><br>(4.83-7.27) |
| Black                           | 8.97<br>(6.6-12.07)         | 5.22 <sup>a</sup><br>(3.61-7.48)   | 2.79<br>(1.43-5.40)              |
| Nonblack                        | 16.32<br>(14.91-17.83)      | 10.62 <sup>a</sup><br>(9.59-11.73) | 6.27 <sup>a</sup><br>(5.09-7.71) |
| <i>Mentholated Cigarette</i>    |                             |                                    |                                  |
| All                             | 7.51<br>(6.53-8.62)         | 4.37 <sup>a</sup><br>(3.78-5.05)   | 2.79 <sup>a</sup><br>(2.19-3.54) |
| Black                           | 5.97<br>(4.21-8.42)         | 2.62 <sup>a</sup><br>(1.66-4.13)   | 1.22<br>(0.39-3.79)              |
| Nonblack                        | 7.70<br>(6.63-8.92)         | 4.65 <sup>a</sup><br>(4.01-5.39)   | 2.96 <sup>a</sup><br>(2.31-3.79) |
| <i>Nonmentholated Cigarette</i> |                             |                                    |                                  |
| All                             | 8.00<br>(7.09-9.02)         | 5.50 <sup>a</sup><br>(4.78-6.33)   | 3.14 <sup>a</sup><br>(2.38-4.14) |
| Black                           | 2.99<br>(1.60-5.52)         | 2.59<br>(1.47-4.54)                | 1.57<br>(0.68-3.60)              |
| Nonblack                        | 8.62<br>(7.64-9.71)         | 5.96 <sup>a</sup><br>(5.17-6.87)   | 3.31 <sup>a</sup><br>(2.49-4.40) |

Note: Figure S1 presents a graph of these results.

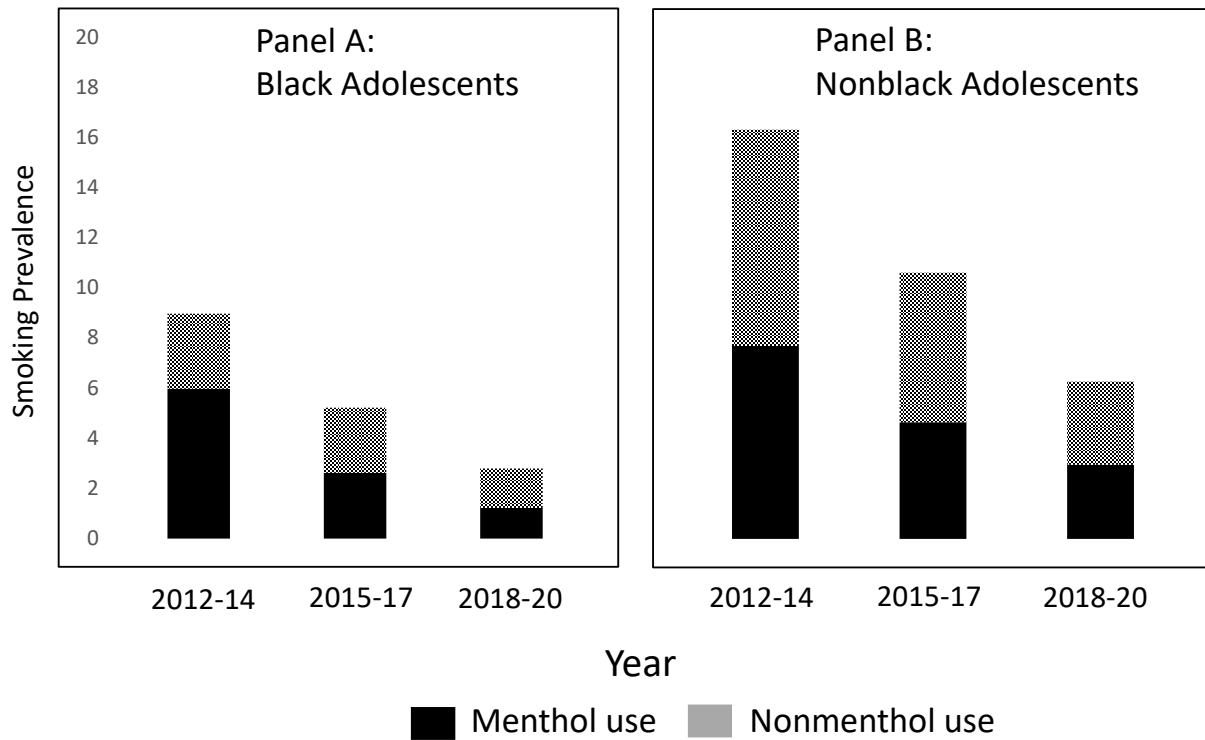

Figure S1: Prevalence of Past 30-Day Smoking by Menthol and Nonmenthol Use, Year, and Race for 12<sup>th</sup> Grade Students
